# Supplementary material
Source: Springer Nature journal article supplement (https://www.springermedizin.de/resource/supplementary/12911_2012_498_MOESM3_ESM.pdf/9526002)

# Average Rating of Each Heuristic

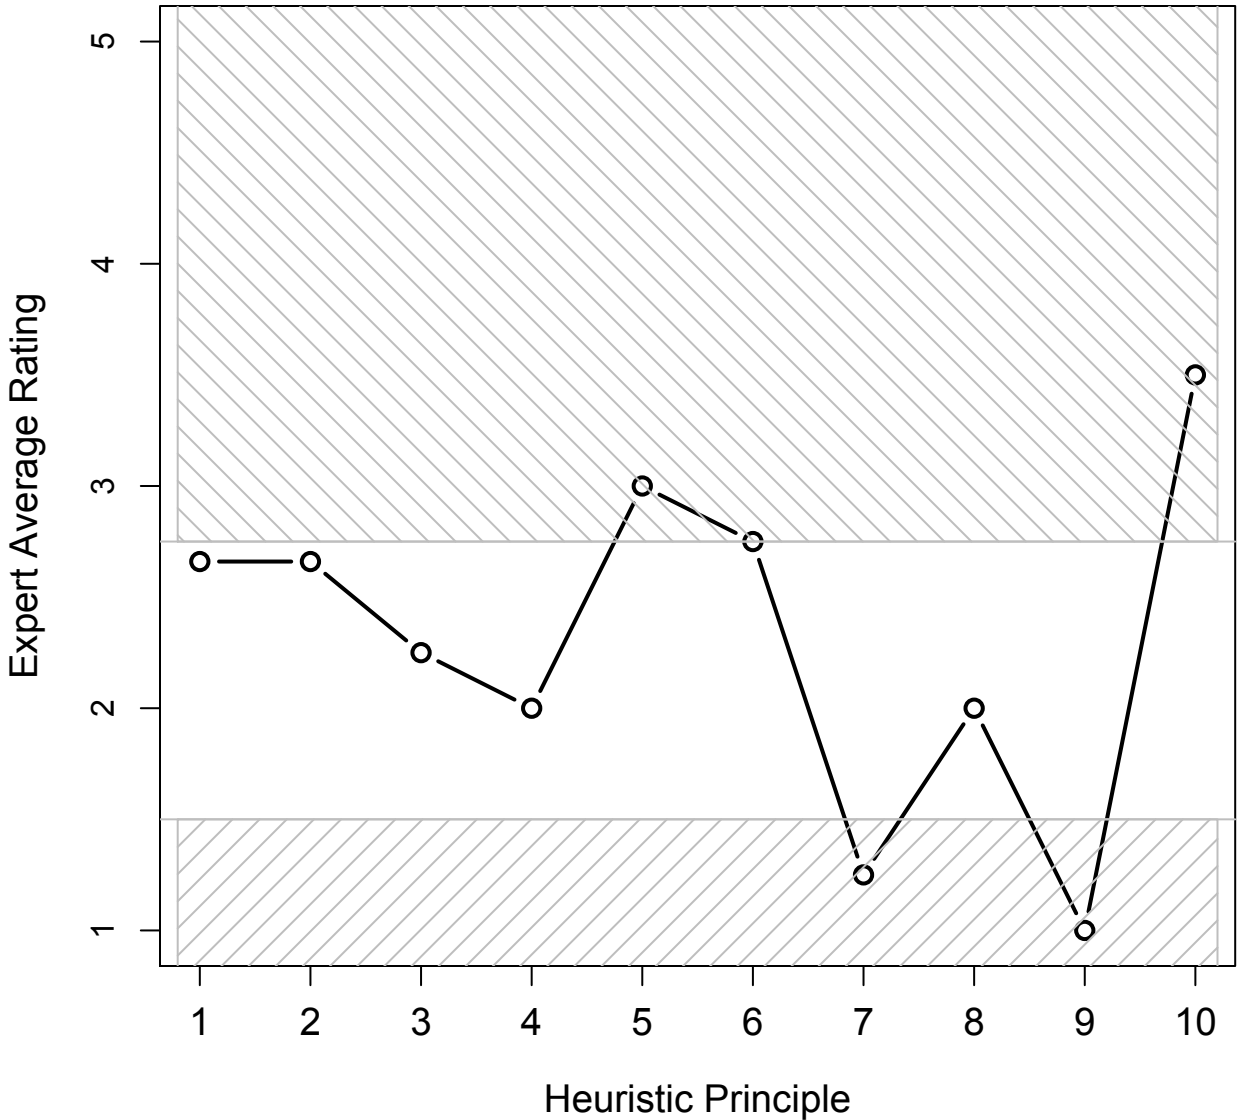

Supplement: MOESM3 [file 9526002]
